# Supplementary material for: Graphic Transmutations: When Meaningless Pictures are Remembered as Familiar Objects
Source: Research Square preprint supplement (doi:10.21203/rs.3.rs-6502291/v1), 2025-05-13
Supplement: Supplementary file 1 [file d43edc640a80abea4d5da830.docx]

**Supplementary Material**

**Table 1.** Sociodemographic data and performance of the participants entering the experiment. The meaningful labels they gave at encoding phase, the presence/absence of graphic transmutation (GT) at recall with the label of any recognizable drawing, the actual reproduction from memory of the ROCF and the relative raw score are also given.

| **Participant** | **Label at encoding** | **ROCF delay** | **Actual reproduction of the ROCF** | **ROCF Score** |
| --- | --- | --- | --- | --- |
| HC1, F, 70y/o, 13y education | House | House and human face | 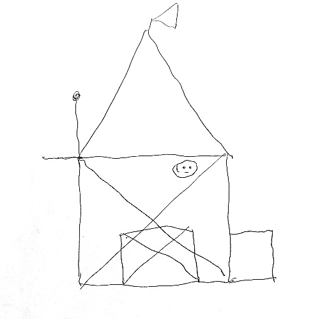 | 8 |
| HC2, M, 68y/o, 17y education | Floor plan of a house | House and smiley face | 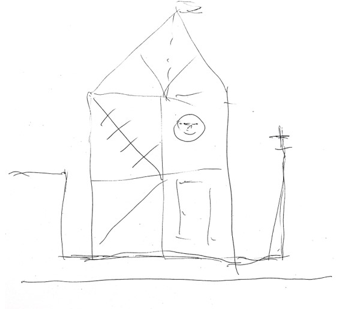 | 11 |
| HC3, M, 74y/o, 8y education | House | House | 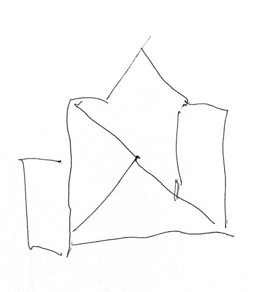 | 2.50* |
| HC4, F, 67y/o, 8y education | House | Church | 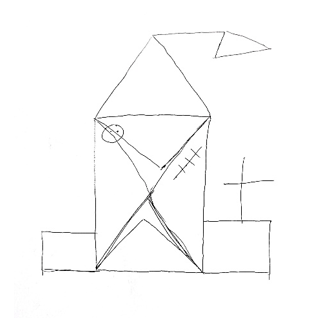 | 7 |
| HC5, M, 67y/o, 10y education | House | No GT | 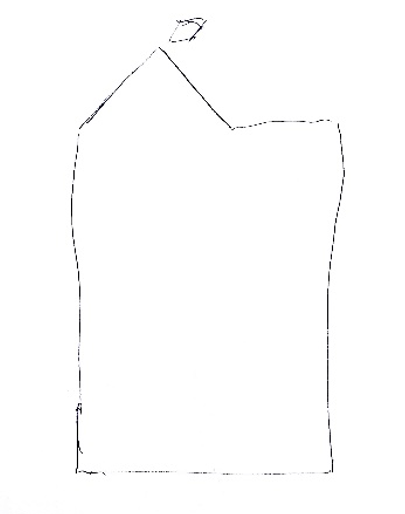 | 3* |
| HC6, M, 66y/o, 8y education | Arrow | No GT | 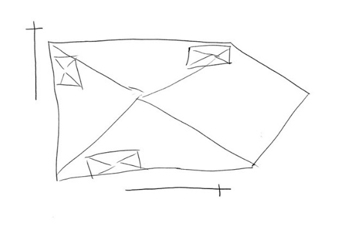 | 5.50* |
| HC7, M, 65y/o, 17y education | Sailing boat | Spaceship | 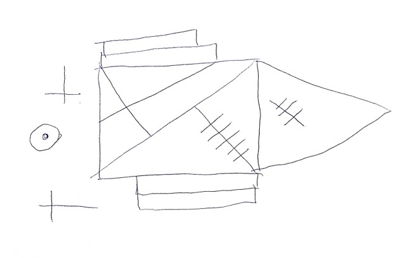 | 8.50* |
| HC8, F, 65y/o, 13y education | House or a Church | House/Church | 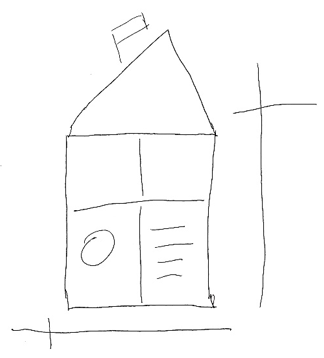 | 8 |
| HC9, M, 77y/o, 11y education | Church with cemetery | No GT | 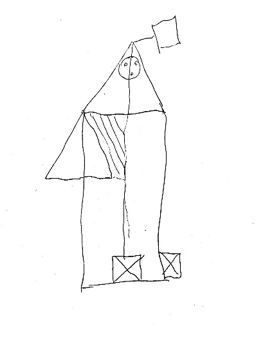 | 13 |
| HC10, F, 65y/o, 8y education | House | No GT | 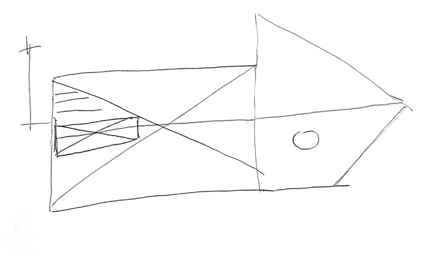 | 12 |
| HC11, M, 68y/o, 8y education | Spaceship | No GT | 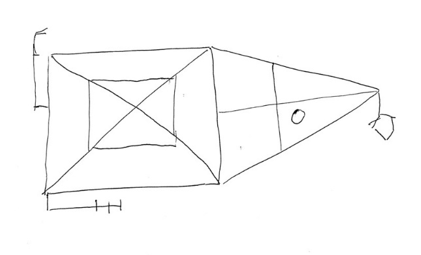 | 13 |
| HC12, F, 68y/o, 8y education | House | No GT | 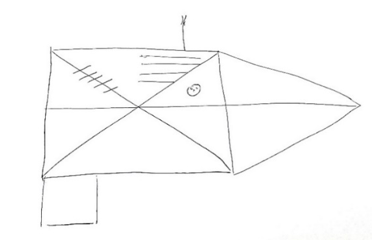 | 15 |
| HC13, F, 69y/o, 16y education | Barracks | House | 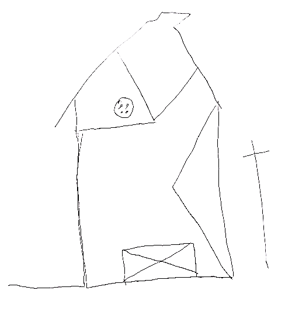 | 5* |
| HC14, F, 70y/o, 8y education | House | No GT | 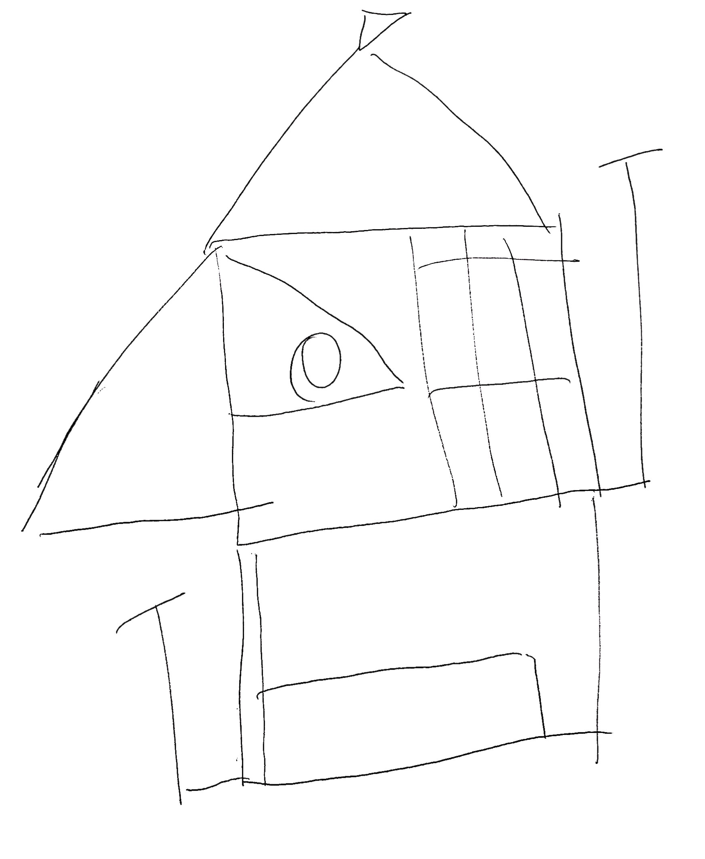 | 10 |

***** Raw scores below cut-off once corrected for age and education according to [14].
